# Supplementary material for: Systematic Analysis of Stability Patterns in Plant Primary Metabolism
Source: PubMed Central journal article supplement (PMC3326025; doi:10.1371/journal.pone.0034686), 2012-04-13

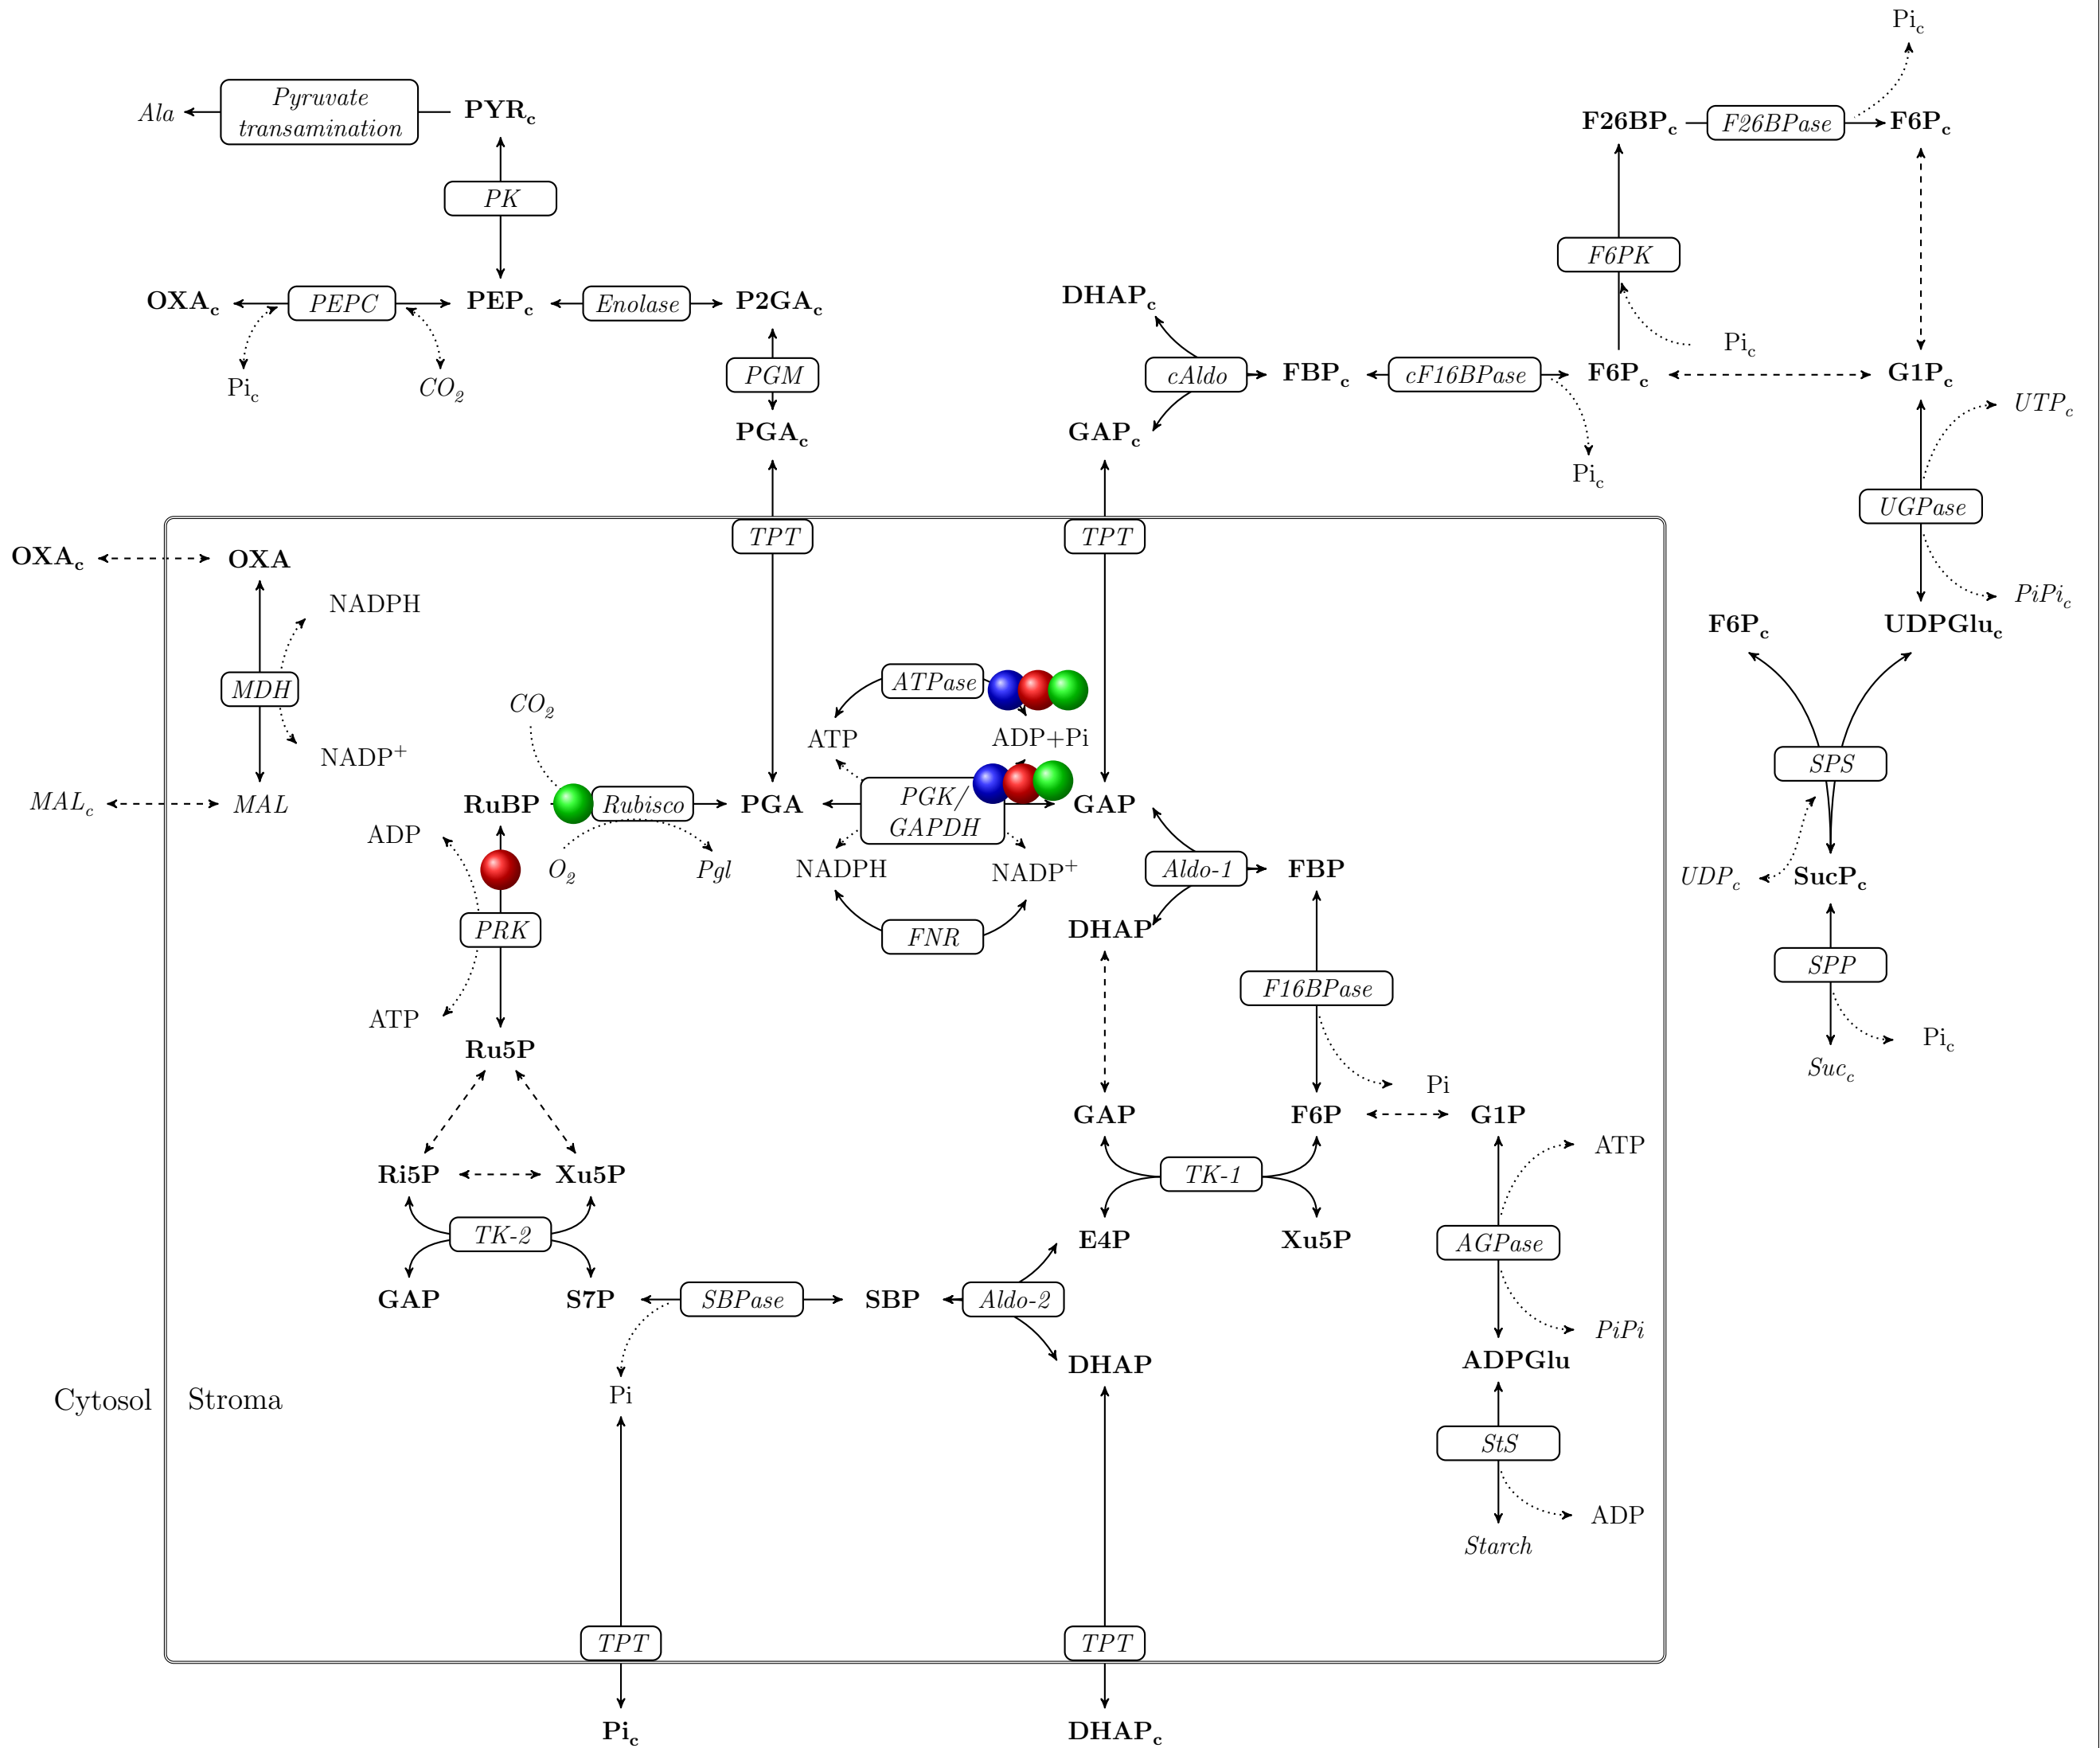

Supplement: pone.0034686.s001.pdf [file pone.0034686.s001.pdf]
